# Supplementary material for: Genomic Instability of Osteosarcoma Cell Lines in Culture: Impact on the Prediction of Metastasis Relevant Genes
Source: PubMed Central journal article supplement (PMC4438062; doi:10.1371/journal.pone.0125611), 2015-05-19
Supplement: pone.0125611.s001.pdf [file pone.0125611.s001.pdf]

**Table A**

| <b>Cell line</b> | <b>Passage (<math>\Delta</math>)</b> | <b>Splitting</b> | <b>Doublings</b> |
|------------------|--------------------------------------|------------------|------------------|
| <i>human</i>     |                                      |                  |                  |
| SAOS             | 38                                   | 1:20             | 164              |
| LM5              | 36                                   | 1:20             | 156              |
| HOS              | 41                                   | 1:200            | 314              |
| 143B             | 36                                   | 1:200            | 275              |
| <i>mouse</i>     |                                      |                  |                  |
| Dunn             | 61                                   | 1:200            | 467              |
| LM8              | 67                                   | 1:200            | 512              |

**Table B**

| <b>Chr.</b>    | <b>Human</b> |             | <b>Mouse</b> |             |
|----------------|--------------|-------------|--------------|-------------|
|                | <b>n</b>     | <b>p(%)</b> | <b>n</b>     | <b>p(%)</b> |
| 1              | 2163         | 10.1        | 1331         | 5.8         |
| 2              | 1360         | 6.4         | 1891         | 8.2         |
| 3              | 1164         | 5.5         | 1101         | 4.8         |
| 4              | 819          | 3.8         | 1318         | 5.7         |
| 5              | 926          | 4.3         | 1340         | 5.8         |
| 6              | 1103         | 5.2         | 1247         | 5.4         |
| 7              | 1025         | 4.8         | 2004         | 8.7         |
| 8              | 774          | 3.6         | 1153         | 5           |
| 9              | 854          | 4           | 1339         | 4.9         |
| 10             | 837          | 3.9         | 1086         | 4.6         |
| 11             | 1353         | 6.3         | 1702         | 7.4         |
| 12             | 1093         | 5.1         | 771          | 3.3         |
| 13             | 382          | 1.8         | 916          | 4           |
| 14             | 668          | 3.1         | 868          | 3.8         |
| 15             | 669          | 3.1         | 878          | 3.8         |
| 16             | 883          | 4.1         | 746          | 3.3         |
| 17             | 1233         | 5.8         | 1118         | 4.8         |
| 18             | 321          | 1.5         | 571          | 2.5         |
| 19             | 1445         | 6.8         | 777          | 3.4         |
| 20             | 607          | 2.8         | n.p.         | n.p.        |
| 21             | 280          | 1.3         | n.p.         | n.p.        |
| 22             | 504          | 2.4         | n.p.         | n.p.        |
| X              | 804          | 3.8         | 891          | 3.9         |
| Y              | 72           | 0.3         | 26           | 0.1         |
| <b>Sum</b>     | <b>21339</b> |             | <b>23074</b> |             |
| <b>Average</b> |              | <b>4.2</b>  |              | <b>4.7</b>  |

## Table C

---

### **Cyclin D1 (CCND1)**

Forward primer: 5'- CCGTCCATGCGGAAGATC -3'

Reverse primer: 5'- ATGGCCAGCGGGAAGAC -3'

### **Integrin $\alpha_4$ (ITGA4)**

Forward primer: 5'- TTCGGAGCCAGCATACTACC -3'

Reverse primer: 5'- GCAGAATCAGACCGAAAAGC -3'

### **Parvin gamma (PARVG)**

Forward primer: 5'- CTACCTCACTCCCAACTCTCCT -3'

Reverse primer: 5'- CTCAGTGTGCTCTTGGCATCCT -3'

### **Myosin regulatory light chain 10 (MYL10)**

Forward primer: 5'- GGATTACAGGCACCGAGAAGAG -3'

Reverse primer: 5'- TGAGCCGAGATCATGCCATTGC -3'

### **Glyceraldehyde-3-phosphate dehydrogenase (GAPDH)**

Forward primer: 5'-AGGGCTGCTTTTAACTCTGGT-3'

Reverse primer: 5'-CCCCACTTGATTTTGGAGGGA-3'

---

**Table D**

| <b>Serial <i>in vitro</i> passaging</b> |                    |                                                                                                                    |
|-----------------------------------------|--------------------|--------------------------------------------------------------------------------------------------------------------|
| <b>(up/down/total)</b>                  | <b>n (up/down)</b> | <b>Affected chromosomes (up + down)</b>                                                                            |
| SAOS (810/487/1297)                     | 4 (2/2)            | <b>1 (145); 5 (53); 6 (68); 12 (83)</b>                                                                            |
| LMS (1035/912/1947)                     | 7 (3/4)            | <b>4 (121); 9 (101); 10 (113); 12 (160); 14 (66); 18 (33); 21 (46)</b>                                             |
| HOS (705/400/1105)                      | 2 (0/2)            | 17 (49); 19 (79)                                                                                                   |
| 143B (338/92/430)                       | 0                  |                                                                                                                    |
| Dunn (313/313/626)                      | 3 (2/1)            | 9 (36); <b>14 (28); 18 (23)</b>                                                                                    |
| LM8 (327/338/665)                       | 1 (1/0)            | <b>X (58)</b>                                                                                                      |
| <b>Metastatic comparison</b>            |                    |                                                                                                                    |
| LMS/SAOS (1283/1295/2578)               | 12 (6/6)           | <b>1 (313); 2 (181); 4 (130); 5 (142); 6 (130); 7 (125); 8 (121); 10 (95); 16 (83); 19 (150); 21 (36); X (119)</b> |
| 143B/HOS (1833/1967/3800)               | 9 (5/4)            | <b>1 (419); 3 (205); 6 (197); 10 (152); 13 (65); 15 (116); 17 (216); 18 (81); 20 (120)</b>                         |
| LM8/Dunn (1363/660/2029)                | 6 (4/2)            | <b>4 (147); 6 (141); 9 (128); 12 (107); 16 (89); 18 (84)</b>                                                       |

**Table E**

|                 | SAOS   |        |            |  |                | LM5    |        |            |
|-----------------|--------|--------|------------|--|----------------|--------|--------|------------|
|                 | early  | late   | late/early |  |                | early  | late   | late/early |
| 1q23.2-q42.13   | normal | gain   | gain       |  |                |        |        |            |
|                 |        |        |            |  | 2p25.2-p25.1   | normal | gain   | gain       |
| 2q11.2          | gain   | normal | loss       |  |                |        |        |            |
| 2q13            | normal | loss   | loss       |  |                |        |        |            |
|                 |        |        |            |  | 2q37.3         | gain   | normal | loss       |
| 3q28-q29        | gain   | normal | loss       |  | 3q28           | gain   | normal | loss       |
|                 |        |        |            |  | 4p16.3-p16.1   | normal | gain   | gain       |
| 4q13.1-q13.3    | gain   | normal | loss       |  |                |        |        |            |
|                 |        |        |            |  | 5p15.33        | normal | gain   | gain       |
|                 |        |        |            |  | 5p14.3         | normal | gain   | gain       |
|                 |        |        |            |  | 5p14.1         | normal | gain   | gain       |
| 6p21.32-p21.1   | gain   | normal | loss       |  |                |        |        |            |
|                 |        |        |            |  | 7p21.1-p11.1   | gain   | normal | loss       |
| 7q36.1-q36.3    | gain   | normal | loss       |  |                |        |        |            |
| 9p12-p11.1      | normal | gain   | gain       |  |                |        |        |            |
| 9q21.13         | gain   | normal | loss       |  | 9q21.13        | gain   | normal | loss       |
| 9q21.33-q32     | gain   | normal | loss       |  | 9q21.31-q31.3  | gain   | normal | loss       |
|                 |        |        |            |  | 9q34.2-q34.3   | gain   | normal | loss       |
|                 |        |        |            |  | 10p            | normal | loss   | loss       |
| 12p13.33        | loss   | normal | gain       |  | 12p13.33       | loss   | normal | gain       |
| 12p13.32-p11.1  | normal | gain   | gain       |  | 12p13.32-p11.1 | normal | gain   | gain       |
| 14q22.3-q32.33  | gain   | normal | loss       |  | 14q22.3-q32.2  | gain   | normal | loss       |
| 18q23           | normal | loss   | loss       |  |                |        |        |            |
| 19q13.11-q13.12 | normal | gain   | gain       |  |                |        |        |            |
|                 |        |        |            |  | 21q            | normal | gain   | gain       |
| Xp22.33-p21.2   | gain   | normal | loss       |  | Xp22.33-p22.31 | normal | gain   | gain       |
| Xq11.2-q27.1    | gain   | normal | loss       |  |                |        |        |            |

**Table F**

|                   | delta CNA bases (directional) | genome fraction | top genes | genes expected | genes observed | sum expected | sum observed | cumulative CNA gene ratio |
|-------------------|-------------------------------|-----------------|-----------|----------------|----------------|--------------|--------------|---------------------------|
| <b>SAOS up</b>    | 137298826                     | 0.044           | 1111      | 49             | 116            |              |              |                           |
| <b>SAOS down</b>  | 237707052                     | 0.077           | 686       | 53             | 86             | 102          | 202          | 2.0                       |
| <b>LM5 up</b>     | 122213823                     | 0.039           | 1489      | 59             | 175            |              |              |                           |
| <b>LM5 down</b>   | 212629685                     | 0.069           | 1277      | 88             | 154            | 146          | 329          | 2.2                       |
|                   |                               |                 |           |                |                |              |              |                           |
| <b>HG19 bases</b> | 3095676202                    |                 |           |                |                |              |              |                           |

Figure 1

A)

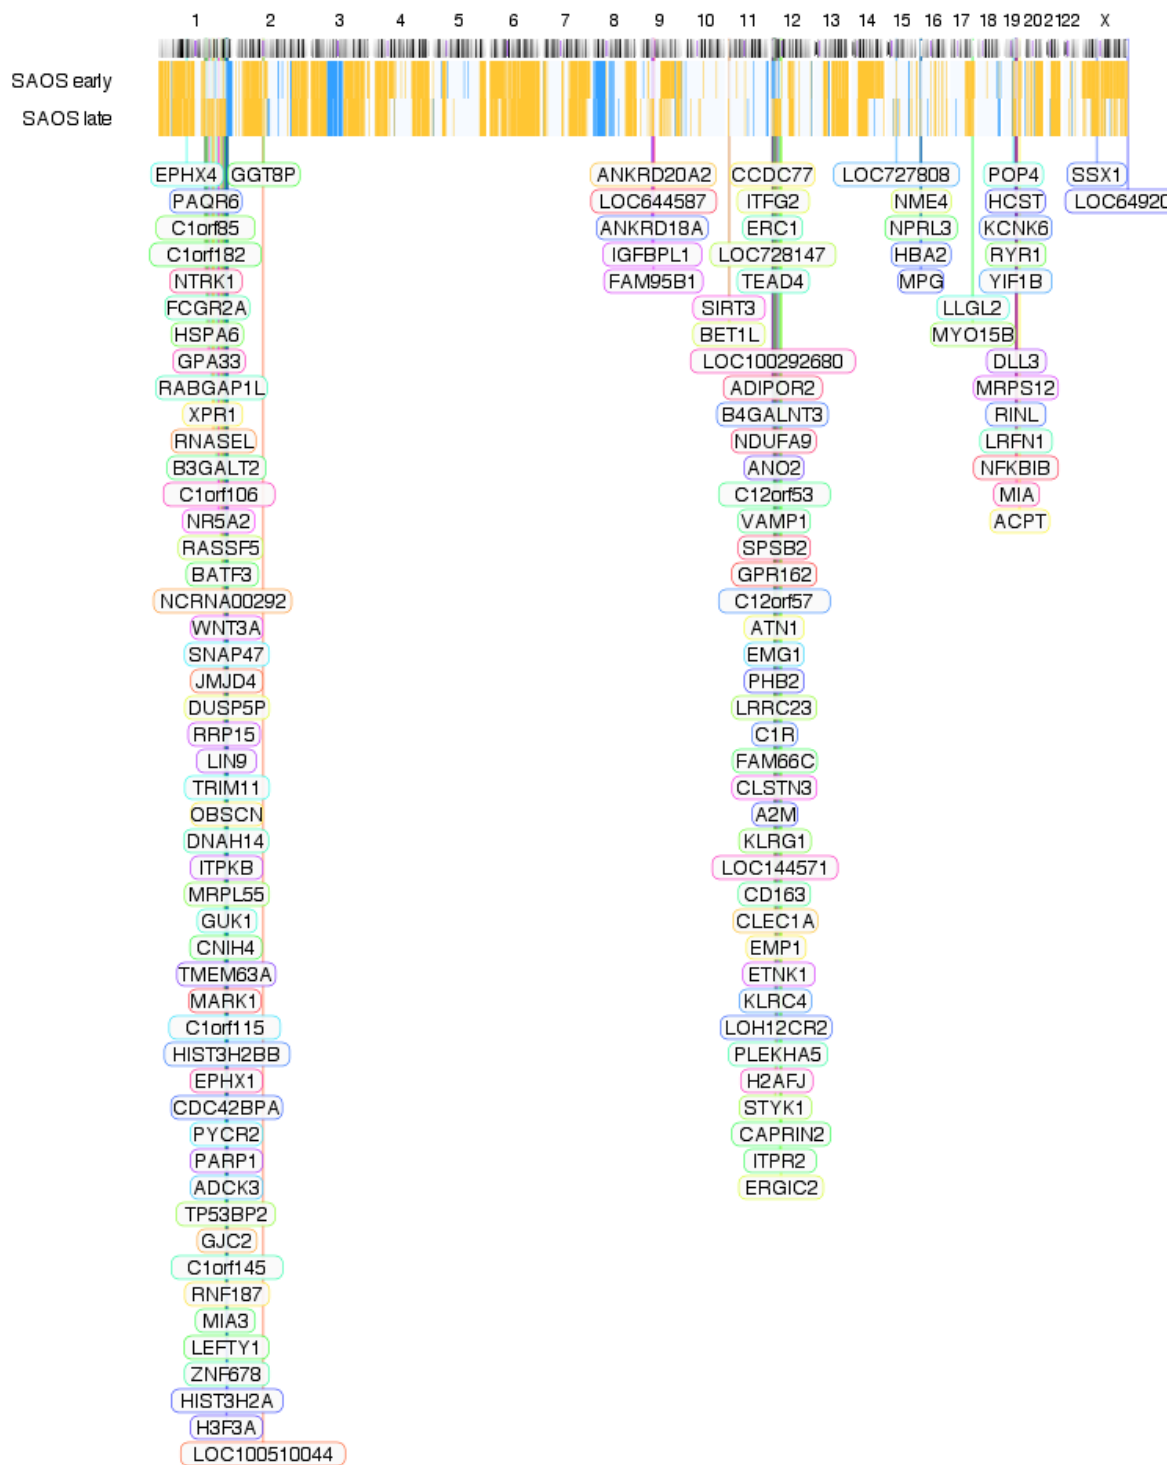

B)

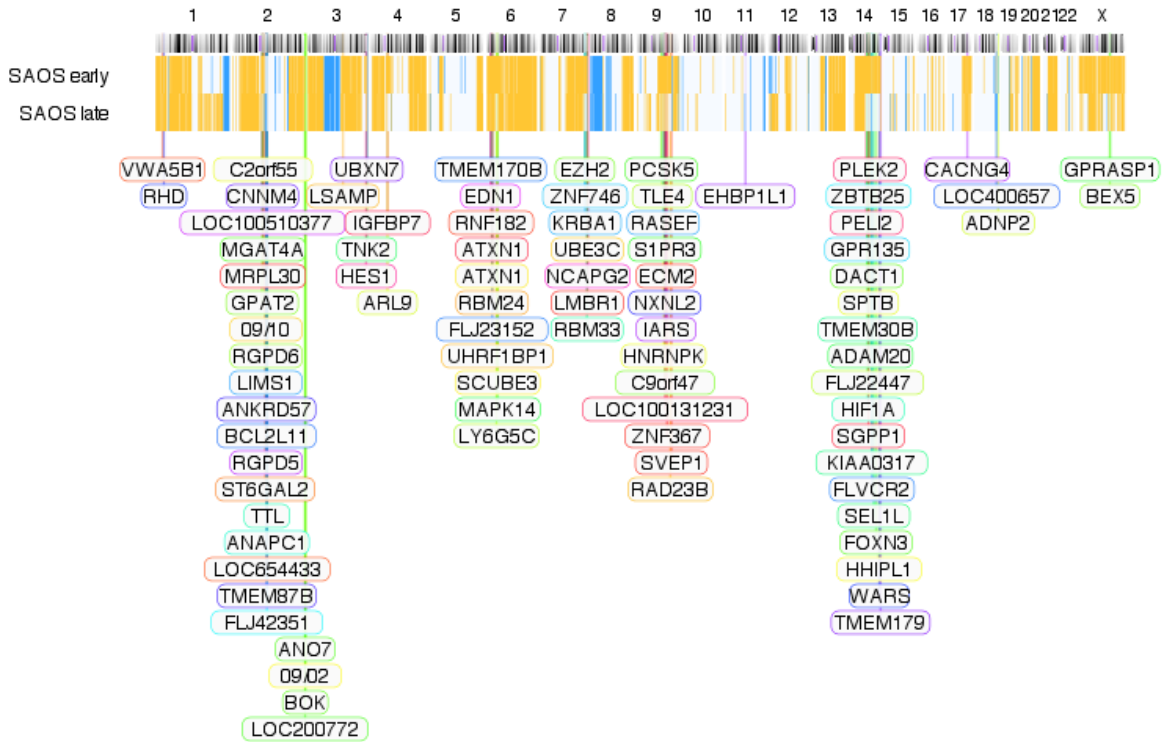



C)

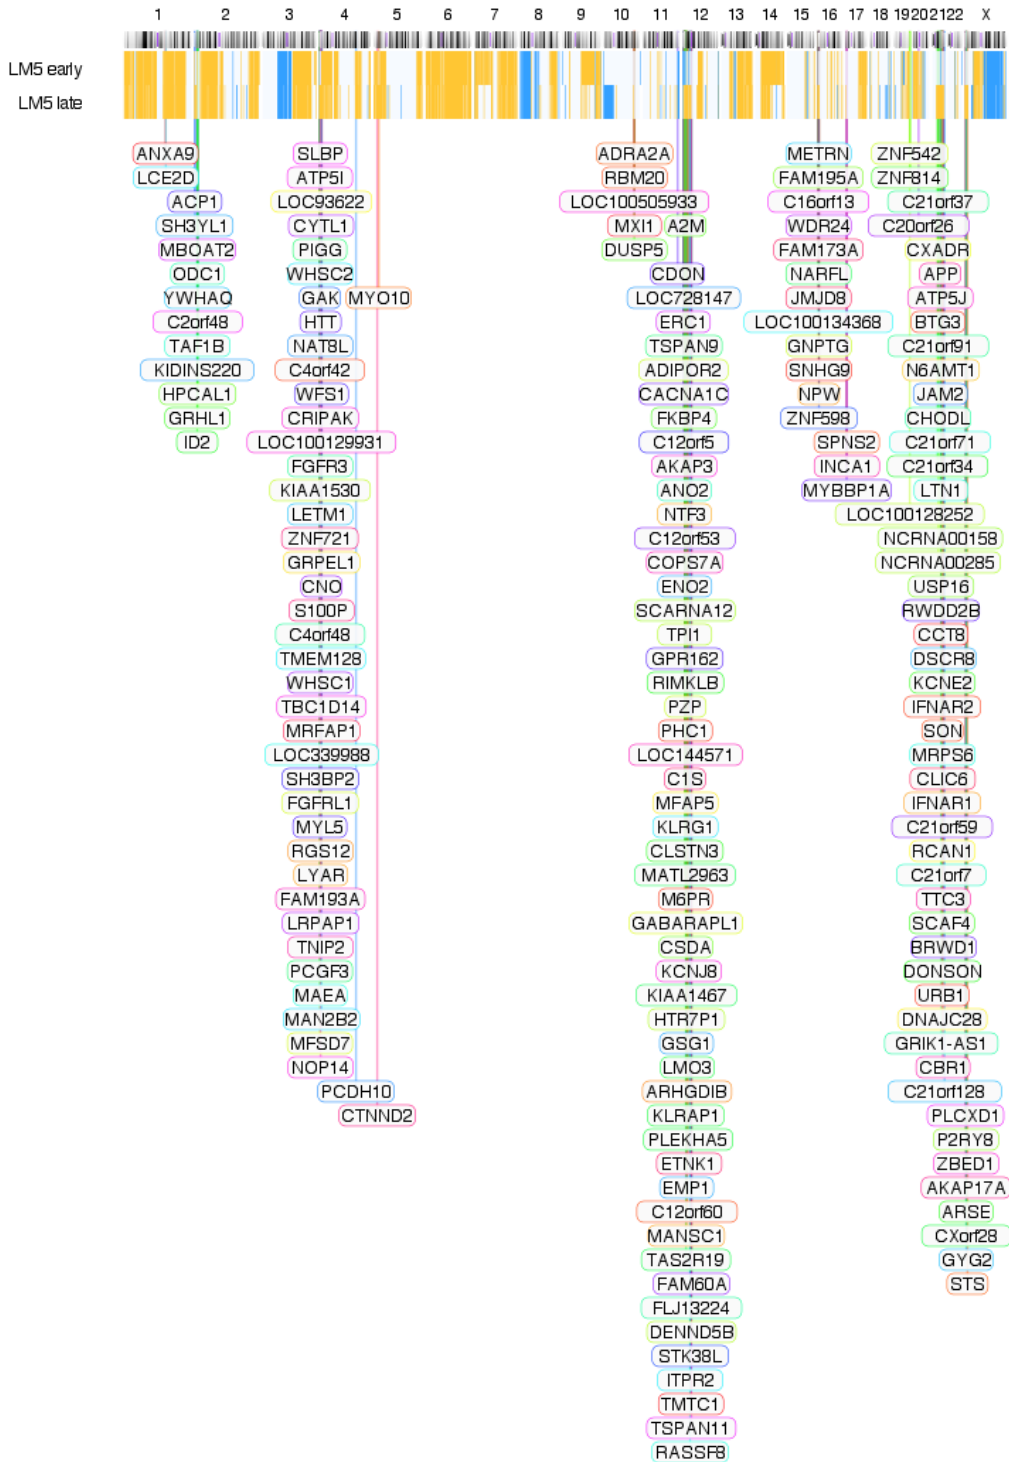

D)

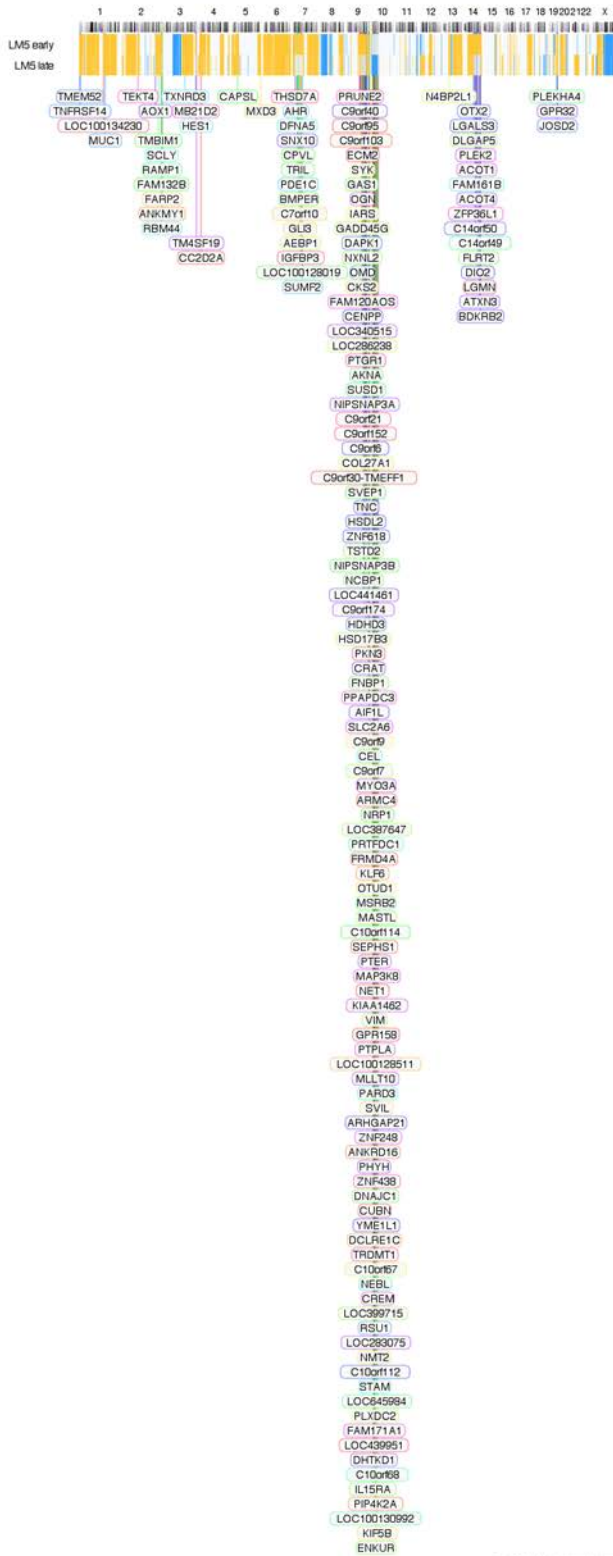

**Table G**

|                 | <b>SAOS</b> | <b>LM5</b>  | <b>LM5/SAOS</b> |
|-----------------|-------------|-------------|-----------------|
| 1q23.1-q23.2    | normal      | gain        | gain            |
| 1q31.1-q31.3    | normal      | gain        | gain            |
| 1q42.2-q44      | loss        | normal      | gain            |
| 2q32.2-q33.1    | gain        | normal      | loss            |
| 3p26.3-p14.3    | gain        | normal      | loss            |
| 4q32.1-q34.3    | gain        | normal      | loss            |
| 5p15.32-p13.3   | normal      | gain        | gain            |
| 8q23.2-q23.3    | gain        | normal      | loss            |
| 8q24.23-q24.3   | gain        | normal      | loss            |
| 15q23-q24.1     | normal      | gain        | gain            |
| 18p11.32        | normal      | loss        | loss            |
| 18p11.31        | normal      | gain        | gain            |
| 20p13-p12.3     | normal      | gain        | gain            |
| 20p12.1         | normal      | gain        | gain            |
| 20q13.12        | gain        | loss        | loss            |
| 20q13.13-q13.33 | gain        | normal      | loss            |
| Xq              | normal/gain | loss/normal | loss            |

Figure 2

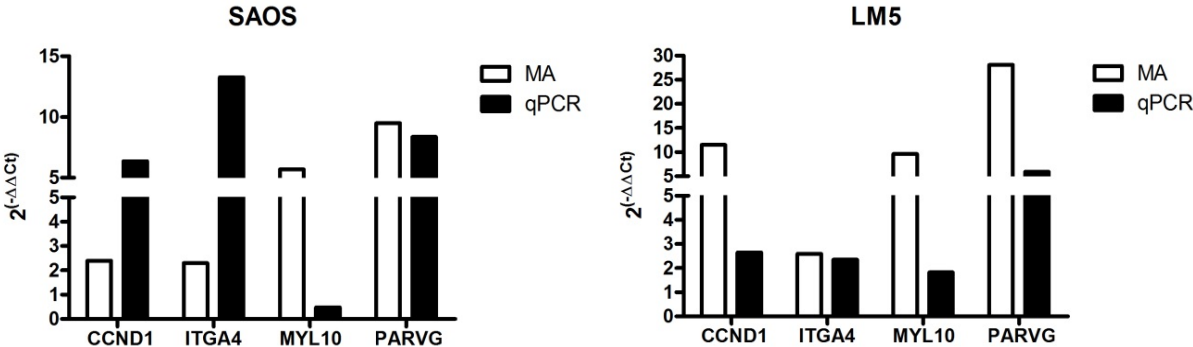

**Table H**

|        |        |                                                                         | LM5/SAOS              |      |      |      |       |
|--------|--------|-------------------------------------------------------------------------|-----------------------|------|------|------|-------|
|        |        |                                                                         | L/L                   | L/E  | E/L  | E/E  | Mean  |
| Gene   | KEGG   |                                                                         | Up-regulated in LM5   |      |      |      |       |
| WNT1   | 7471   | wingless-type MMTV integration site family, member 1                    | 7                     | 11.3 | 10.9 | 17.5 | 11.7  |
| FIGF   | 2277   | c-fos induced growth factor (vascular endothelial growth factor D)      | 4.9                   | 8.9  | 7.8  | 14.1 | 8.9   |
| PTCH1  | 5727   | patched 1                                                               | 9.5                   | 11.5 | 5.3  | 3.8  | 7.5   |
| RASSF5 | 83593  | Ras association (RalGDS/AF-6) domain family member 5                    | 6.4                   | 14.3 | 2.2  | 4.9  | 7.0   |
| FGF5   | 2250   | fibroblast growth factor 5                                              | 5.5                   | 3.7  | 6.9  | 4.8  | 5.2   |
| FOXO1  | 2308   | forkhead box O1                                                         | 3                     | 3.2  | 2.3  | 2.5  | 2.8   |
| FH     | 2271   | fumarate hydratase                                                      | 2.2                   | 2.6  | 2.3  | 2.7  | 2.5   |
|        |        |                                                                         | Down-regulated in LM5 |      |      |      |       |
| TCF7L1 | 83439  | transcription factor 7-like 1 (T-cell specific, HMG-box)                | 100                   | 100  | 100  | 100  | 100.0 |
| PLCG2  | 5336   | phospholipase C, gamma 2 (phosphatidylinositol-specific)                | 33.3                  | 6.3  | 33.3 | 5.3  | 19.6  |
| PPARG  | 5468   | peroxisome proliferator-activated receptor gamma                        | 11.1                  | 14.3 | 16.7 | 20   | 15.5  |
| FGF1   | 2246   | fibroblast growth factor 1 (acidic)                                     | 2.1                   | 4    | 20   | 33.3 | 14.9  |
| KIT    | 3815   | v-kit Hardy-Zuckerman 4 feline sarcoma viral oncogene homolog           | 4.3                   | 8.3  | 2.8  | 4.3  | 4.9   |
| FZD8   | 8325   | frizzled family receptor 8                                              | 4                     | 5.6  | 3    | 4.2  | 4.2   |
| STK4   | 6789   | serine/threonine kinase 4                                               | 2.8                   | 3.4  | 2.6  | 3.2  | 3.0   |
|        |        |                                                                         | LM8/Dunn              |      |      |      |       |
|        |        |                                                                         | L/L                   | L/E  | E/L  | E/E  | Mean  |
|        |        |                                                                         | Up-regulated in LM8   |      |      |      |       |
| EGFR   | 13649  | epidermal growth factor receptor                                        | 25.9                  | 19   | 75   | 57   | 44.2  |
| DAPK2  | 13143  | death-associated protein kinase 2                                       | 26.4                  | 7.1  | 24   | 6.8  | 16.1  |
| MMP2   | 17390  | matrix metalloproteinase 2                                              | 10                    | 7.2  | 13.5 | 10   | 10.2  |
| WNT8B  | 22423  | wingless related MMTV integration site 8b                               | 14.1                  | 8.1  | 12.1 | 5.9  | 10.1  |
| BIRC3  | 11796  | baculoviral IAP repeat-containing 3                                     | 6.7                   | 10.3 | 7.3  | 10.5 | 8.7   |
| PTCH2  | 19207  | patched homolog 2                                                       | 3.5                   | 15.3 | 2.1  | 8.3  | 7.3   |
| WNT1   | 22408  | wingless-related MMTV integration site 1                                | 8.5                   | 6.1  | 7.7  | 5.5  | 7     |
| MAPK1  | 26413  | mitogen-activated protein kinase 1                                      | 2.3                   | 7    | 2.4  | 7.3  | 4.8   |
| CSF1R  | 12978  | colony stimulating factor 1 receptor                                    | 5.1                   | 5    | 4.4  | 3.9  | 4.6   |
| GLI2   | 14633  | GLI-Kruppel family member GLI2                                          | 3.8                   | 4.4  | 4.3  | 4.8  | 4.3   |
| PIAS1  | 56469  | protein inhibitor of activated STAT 1                                   | 3.8                   | 5    | 2.2  | 2.9  | 3.5   |
| SUFU   | 24069  | suppressor of fused homolog (Drosophila)                                | 2.4                   | 4.3  | 2.3  | 4.2  | 3.3   |
| TRAF3  | 22031  | TNF receptor-associated factor 3                                        | 3.1                   | 3.5  | 2.6  | 3    | 3.1   |
| FZD7   | 14369  | frizzled homolog 7 (Drosophila)                                         | 3.2                   | 3.2  | 2.5  | 2.1  | 2.8   |
|        |        |                                                                         | Down-regulated in LM8 |      |      |      |       |
| PDGFB  | 18591  | platelet derived growth factor, B polypeptide                           | 100                   | 100  | 50   | 100  | 87.5  |
| LAMA1  | 16772  | laminin, alpha 1                                                        | 111                   | 50   | 9.1  | 5    | 43.8  |
| VEGFC  | 22341  | vascular endothelial growth factor C                                    | 33.3                  | 100  | 5.3  | 10   | 37.2  |
| PPARG  | 19016  | peroxisome proliferator activated receptor gamma                        | 50                    | 10   | 50   | 10   | 30    |
| LEF1   | 16842  | lymphoid enhancer binding factor 1                                      | 10                    | 33.3 | 50   | 20   | 28.3  |
| KITL   | 17311  | kit ligand                                                              | 9.1                   | 16.7 | 6.3  | 11.1 | 10.8  |
| PLCG2  | 234779 | phospholipase C, gamma 2                                                | 12.5                  | 7.7  | 8.3  | 4.8  | 8.3   |
| CSF2RA | 12982  | colony stimulating factor 2 receptor, alpha, low-affinity (granulocyte- | 5                     | 10   | 7.7  | 10   | 8.2   |
| ITGA3  | 16400  | integrin alpha 3                                                        | 6.3                   | 6.3  | 4.3  | 4.3  | 5.3   |
| PRKCC  | 18752  | protein kinase C, gamma                                                 | 6.7                   | 2.4  | 6.3  | 2.2  | 4.4   |
| NFKB1  | 18033  | nuclear factor of kappa light polypeptide gene enhancer in B-cells 1, p | 4                     | 3.8  | 2.7  | 2.6  | 3.3   |
| STAT3  | 20848  | signal transducer and activator of transcription 3                      | 2.8                   | 3.1  | 3.2  | 2.9  | 3     |
| MITF   | 17342  | microphthalmia-associated transcription factor                          | 2.6                   | 3.3  | 2.2  | 2.9  | 2.8   |
| LAMA4  | 16775  | laminin, alpha 4                                                        | 2.9                   | 3.2  | 2.1  | 2.4  | 2.7   |
| MYC    | 17869  | myelocytomatosis oncogene                                               | 2.5                   | 2.8  | 2.1  | 2.2  | 2.4   |

|                               |       |                                                                            |  |  | 143B/HOS |      |      |      |       |
|-------------------------------|-------|----------------------------------------------------------------------------|--|--|----------|------|------|------|-------|
|                               |       |                                                                            |  |  | L/L      | L/E  | E/L  | E/E  | Mean  |
| <b>Up-regulated in 143B</b>   |       |                                                                            |  |  |          |      |      |      |       |
| MMP1                          | 4312  | matrix metalloproteinase 1 (interstitial collagenase)                      |  |  | 1087     | 649  | 716  | 433  | 721.3 |
| RAC2                          | 5880  | rho family, small GTP binding protein Rac2                                 |  |  | 105      | 58.7 | 98.5 | 54.5 | 79.2  |
| HHIP                          | 64399 | hedgehog interacting protein                                               |  |  | 19.9     | 31.4 | 34.7 | 57.2 | 35.8  |
| FGF5                          | 2250  | fibroblast growth factor 5                                                 |  |  | 42.9     | 17.9 | 50.9 | 22.1 | 33.5  |
| WNT7A                         | 7476  | wingless-type MMTV integration site family, member 7A                      |  |  | 18.5     | 16.6 | 17.4 | 15.7 | 17.1  |
| BMP2                          | 650   | bone morphogenetic protein 2                                               |  |  | 4.3      | 33   | 3.3  | 26.5 | 16.8  |
| COL4A6                        | 1288  | collagen, type IV, alpha 6                                                 |  |  | 17.2     | 19   | 10.1 | 11   | 14.3  |
| IL8                           | 3576  | interleukin 8                                                              |  |  | 17.9     | 14.7 | 6    | 5.1  | 10.9  |
| LAMB3                         | 3914  | laminin, beta 3                                                            |  |  | 12.1     | 8.4  | 10.7 | 7.3  | 9.6   |
| LEF1                          | 51176 | lymphoid enhancer-binding factor 1                                         |  |  | 2.2      | 16.7 | 2.2  | 17.1 | 9.6   |
| FZD8                          | 8325  | frizzled family receptor 8                                                 |  |  | 9.8      | 8.5  | 8.5  | 7.3  | 8.5   |
| WNT7B                         | 7477  | wingless-type MMTV integration site family, member 7B                      |  |  | 2.7      | 15.4 | 2.3  | 12.6 | 8.3   |
| ITGA2                         | 3673  | integrin, alpha 2 (CD49B, alpha 2 subunit of VLA-2 receptor)               |  |  | 10.5     | 10   | 5.4  | 5.5  | 7.9   |
| PTGS2                         | 5743  | prostaglandin-endoperoxide synthase 2                                      |  |  | 7.6      | 7.7  | 4.9  | 5    | 6.3   |
| FOS                           | 2353  | FBJ murine osteosarcoma viral oncogene homolog                             |  |  | 6.4      | 6.9  | 4    | 4.2  | 5.4   |
| FGF7                          | 2252  | fibroblast growth factor 7                                                 |  |  | 3.7      | 7    | 3.4  | 6.7  | 5.2   |
| TGFB2                         | 7048  | transforming growth factor, beta receptor II (70/80kDa)                    |  |  | 6.3      | 6.6  | 3.8  | 2.9  | 4.9   |
| JUN                           | 3725  | jun proto-oncogene                                                         |  |  | 4.5      | 4.6  | 4.1  | 4.2  | 4.4   |
| BCL2                          | 596   | B-cell CLL/lymphoma 2                                                      |  |  | 3        | 3.8  | 3.2  | 4.2  | 3.6   |
| PIK3CG                        | 5294  | phosphoinositide-3-kinase, catalytic, gamma polypeptide                    |  |  | 2.5      | 4.4  | 2.3  | 4    | 3.3   |
| TCF7                          | 6932  | transcription factor 7 (T-cell specific, HMG-box)                          |  |  | 2.2      | 4.3  | 2.4  | 3.1  | 3.0   |
| NRAS                          | 4893  | neuroblastoma RAS viral (v-ras) oncogene homolog                           |  |  | 2.3      | 2.1  | 3.6  | 3.1  | 2.8   |
| WNT2B                         | 7482  | wingless-type MMTV integration site family, member 2B                      |  |  | 2.9      | 2.9  | 2.4  | 2.4  | 2.7   |
| CCNE2                         | 9134  | cyclin E2                                                                  |  |  | 2.3      | 2.4  | 2.6  | 2.7  | 2.5   |
| MMP9                          | 4318  | matrix metalloproteinase 9                                                 |  |  | 2.6      | 2.9  | 2.2  | 2.4  | 2.5   |
| DVL1                          | 1855  | dishevelled, dsh homolog 1 (Drosophila)                                    |  |  | 2.2      | 2.5  | 2.1  | 2.1  | 2.2   |
| <b>Down-regulated in 143B</b> |       |                                                                            |  |  |          |      |      |      |       |
| PDGFRB                        | 5159  | platelet-derived growth factor receptor, beta polypeptide                  |  |  | 333      | 333  | 333  | 250  | 312   |
| EGF                           | 1950  | epidermal growth factor                                                    |  |  | 50       | 50   | 20   | 25   | 36    |
| NOS2                          | 4843  | nitric oxide synthase 2, inducible                                         |  |  | 33.3     | 20   | 33.3 | 25   | 27.9  |
| GLI1                          | 2735  | GLI family zinc finger 1                                                   |  |  | 25       | 3.3  | 50   | 5.6  | 21    |
| RUNX1T1                       | 862   | runt-related transcription factor 1; translocated to, 1 (cyclin D-related) |  |  | 25       | 12.5 | 25   | 12.5 | 19    |
| FN1                           | 2335  | fibronectin 1                                                              |  |  | 7.7      | 8.3  | 10   | 11.1 | 9.3   |
| STAT5A                        | 6776  | signal transducer and activator of transcription 5A                        |  |  | 8.3      | 11.1 | 6.7  | 9.1  | 8.8   |
| JUP                           | 3728  | junction plakoglobin                                                       |  |  | 11.1     | 6.7  | 10   | 5.9  | 8.4   |
| FLT3                          | 2322  | fms-related tyrosine kinase 3                                              |  |  | 11.1     | 6.3  | 7.1  | 4.2  | 7.2   |
| LAMC3                         | 10319 | laminin, gamma 3                                                           |  |  | 7.7      | 7.7  | 5.9  | 5.6  | 6.7   |
| FOXO1                         | 2308  | forkhead box O1                                                            |  |  | 4.2      | 7.1  | 4    | 6.7  | 5.5   |
| FGF18                         | 8817  | fibroblast growth factor 18                                                |  |  | 8.3      | 3.7  | 6.7  | 3    | 5.4   |
| TGFB2                         | 7042  | transforming growth factor, beta 2                                         |  |  | 5.6      | 6.7  | 4.2  | 5    | 5.3   |
| FGF1                          | 2246  | fibroblast growth factor 1 (acidic)                                        |  |  | 5        | 7.1  | 2.9  | 4    | 5     |
| ARAF                          | 369   | v-raf murine sarcoma 3611 viral oncogene homolog                           |  |  | 5        | 5.9  | 3.7  | 4.3  | 5     |
| COL4A1                        | 1282  | collagen, type IV, alpha 1                                                 |  |  | 4.2      | 5.9  | 4    | 5.6  | 4.9   |
| TRAF5                         | 7188  | TNF receptor-associated factor 5                                           |  |  | 3.7      | 4.3  | 4.8  | 5.6  | 4.6   |
| PDGFB                         | 5155  | platelet-derived growth factor beta polypeptide                            |  |  | 3.6      | 6.3  | 2.9  | 5    | 4.4   |
| BMP4                          | 652   | bone morphogenetic protein 4                                               |  |  | 2.9      | 6.7  | 2.3  | 5.3  | 4.3   |
| COL4A4                        | 1286  | collagen, type IV, alpha 4                                                 |  |  | 3.6      | 2.5  | 6.7  | 4.3  | 4.3   |
| PTCH1                         | 5727  | patched 1                                                                  |  |  | 4.2      | 4.3  | 4    | 4.2  | 4.2   |
| FZD2                          | 2535  | frizzled family receptor 2                                                 |  |  | 4.2      | 4    | 3.2  | 3    | 3.6   |
| LAMA5                         | 3911  | laminin, alpha 5                                                           |  |  | 3.2      | 2.4  | 4.5  | 3.6  | 3.4   |
| TCF7L1                        | 83439 | transcription factor 7-like 1 (T-cell specific, HMG-box)                   |  |  | 2.9      | 3.1  | 3.3  | 3.6  | 3.2   |
| WNT3                          | 7473  | wingless-type MMTV integration site family, member 3                       |  |  | 3.6      | 2.4  | 3.8  | 2.6  | 3.1   |
| IKKB                          | 3551  | inhibitor of kappa light polypeptide gene enhancer in B-cells, kinase beta |  |  | 3        | 2.5  | 2.7  | 2.3  | 3     |
| ITGAV                         | 3685  | integrin, alpha V (vitronectin receptor, alpha polypeptide, antigen CD51)  |  |  | 2.4      | 2.3  | 3.2  | 3.1  | 2.8   |
| ARNT                          | 405   | aryl hydrocarbon receptor nuclear translocator                             |  |  | 2.4      | 3.3  | 2.1  | 3    | 2.7   |
| COL4A2                        | 1284  | collagen, type IV, alpha 2                                                 |  |  | 2.6      | 2.8  | 2.7  | 2.9  | 2.7   |
| ERBB2                         | 2064  | v-erb-b2 erythroblastic leukemia viral oncogene homolog 2                  |  |  | 2.5      | 2.2  | 3.1  | 2.8  | 2.7   |
| CTNNA1                        | 1495  | catenin (cadherin-associated protein), alpha 1, 102kDa                     |  |  | 2.6      | 2.6  | 2.3  | 2.4  | 2.5   |
| LAMC1                         | 3915  | laminin, gamma 1 (formerly LAMB2)                                          |  |  | 2.2      | 2.6  | 2.3  | 2.7  | 2.4   |

**Table I**

|           |                                                                                                                       |
|-----------|-----------------------------------------------------------------------------------------------------------------------|
| SAOS_up   | BMP2, BMP7, CCND1, DAAM2, DKK1, HHIP, IHH, NFATC1, WIF1, WNT3A, WNT6, WNT11                                           |
| SAOS_down | NKD2, MAPK9, SFRP2                                                                                                    |
| LM5_up    | BMP6, CAMK2B, CCND1, DAAM2, GLI2, IHH, LRP5, PLCB1, PRKACG, PPP2R1B, SFRP1, WIF1, WNT6                                |
| LM5_down  | BMP7, FZD7, GAS1, GLI3, LEF1, NFATC1, PRICKLE1, WNT2B                                                                 |
|           |                                                                                                                       |
| HOS_up    | APC2, BMP2, BMP7, CCND2, CXXC4, FZD10, GLI1, LEF1, NFATC4, NKD2, PLCB1, WIF1, WNT3A, WNT4, WNT6, WNT7B, WNT10B, WNT11 |
| HOS_down  |                                                                                                                       |
| 143B_up   | APC, CXXC4, ROCK1, ROCK2                                                                                              |
| 143B_down |                                                                                                                       |
|           |                                                                                                                       |
| Dunn_up   | CCND2, LEF1, PRICKLE1, RHOA, SFRP4, WIF1, WNT6, WNT10A                                                                |
| Dunn_down |                                                                                                                       |
| LM8_up    | BMP7, CER1, MAPK10, SFRP4, TCF7L1, WNT11                                                                              |
| LM8_down  | DAAM2, FOSL1, FZD8, NFATC4, RAC3                                                                                      |

**Table J**

|                        | L/L         | E/L         | L/E         | E/E         | combined    |
|------------------------|-------------|-------------|-------------|-------------|-------------|
| <b>LM5/SAOS</b>        |             |             |             |             |             |
| <b>Up-regulation</b>   |             |             |             |             |             |
| Total                  | 1613        | 1368        | 1848        | 1291        | 3174        |
| HH                     | 10 (1.8E-2) | 6 (2.4E-1)  | 13 (5.1E-3) | 10 (5.7E-3) | 14 (6E-2)   |
| WNT                    | 16 (1.3E-1) | 10 (5.5E-1) | 17 (3.5E-1) | 15 (6.9E-2) | 23 (5.6E-1) |
| <b>Down-regulation</b> |             |             |             |             |             |
| Total                  | 1685        | 1634        | 1462        | 1215        | 2942        |
| HH                     | 7 (3.4E-1)  | 5 (6.8E-1)  | 4 (7.9E-1)  | 2 (9.7E-1)  | 8 (7.2E-1)  |
| WNT                    | 17 (2.1E-1) | 21 (1.9E-2) | 15 (2.1E-1) | 17 (1.4E-2) | 30 (6.3E-2) |
| <b>LM8/Dunn</b>        |             |             |             |             |             |
| <b>Up-regulation</b>   |             |             |             |             |             |
| Total                  | 2008        | 1324        | 3025        | 2067        | 4174        |
| HH                     | 8 (2E-1)    | 8 (3E-2)    | 13 (4.6E-2) | 16 (9.5E-5) | 19 (4.6E-3) |
| WNT                    | 23 (1.2E-2) | 15 (4E-2)   | 28 (5.2E-2) | 27 (1.4E-3) | 44 (6E-4)   |
| <b>Down-regulation</b> |             |             |             |             |             |
| Total                  | 1376        | 944         | 3223        | 2021        | 4060        |
| HH                     | 4 (7.2E-1)  | 4 (4.4E-1)  | 7 (8.3E-1)  | 5 (7.5E-1)  | 11 (5.2E-1) |
| WNT                    | 9 (8E-1)    | 6 (8.1E-1)  | 20 (8E-1)   | 8 (9.9E-1)  | 23 (8.8E-1) |
| <b>143B/HOS</b>        |             |             |             |             |             |
| <b>Up-regulation</b>   |             |             |             |             |             |
| Total                  | 1725        | 1888        | 1863        | 1821        | 2914        |
| HH                     | 13 (2.1E-3) | 13 (5.2E-3) | 11 (2.2E-2) | 9 (1.1E-1)  | 14 (3.1E-2) |
| WNT                    | 21 (3E-2)   | 23 (2.6E-2) | 24 (6E-3)   | 25 (2.8E-3) | 35 (3E-3)   |
| <b>Down-regulation</b> |             |             |             |             |             |
| Total                  | 1999        | 2341        | 1954        | 2035        | 3342        |
| HH                     | 10 (1.1E-1) | 12 (4.2E-2) | 7 (4.6E-1)  | 8 (3.2E-1)  | 12 (2.5E-1) |
| WNT                    | 19 (2.8E-1) | 28 (8.2E-3) | 14 (7.2E-1) | 15 (6.5E-1) | 29 (1.8E-1) |



**Table K**

| Up-regulated in LM5 |       |      |       |      |       |       |
|---------------------|-------|------|-------|------|-------|-------|
|                     | L/L   | E/L  | L/E   | E/E  | Mean  | Comp. |
| WIF1                | 124.2 | 19.2 | 468.1 | 67.1 | 169.7 | 4     |
| IHH                 | 21.2  | 1    | 58.5  | 2.8  | 20.9  | 3     |
| PLCB1               | 23.9  | 4    | 26.1  | 4.1  | 14.5  | 4     |
| WNT1                | 7     | 10.9 | 11.3  | 17.5 | 11.7  | 4     |
| BMP6                | 17.4  | 3.2  | 15.8  | 2.8  | 9.8   | 4     |
| NKD2                | 8.5   | 4.4  | 13.7  | 7.1  | 8.4   | 4     |
| PTCH1               | 9.5   | 5.3  | 11.5  | 3.8  | 7.5   | 4     |
| WNT6                | 5.8   | 1    | 14    | 2.4  | 5.8   | 3     |
| DAAM2               | 2.8   | 0.9  | 11.7  | 3.6  | 4.8   | 3     |
| NKD1                | 2.9   | 2.1  | 5.7   | 4.1  | 3.7   | 4     |
| HHIP                | 2     | 2.5  | 4.3   | 5.3  | 3.5   | 3     |
| GLI2                | 3.3   | 2    | 5.4   | 3.2  | 3.5   | 3     |
| WNT10B              | 3.2   | 1.8  | 5.3   | 2.9  | 3.3   | 3     |
| FZD7                | 2.6   | 5.3  | 1.4   | 2.8  | 3.0   | 3     |
| WNT11               | 2.1   | 1.3  | 4.3   | 2.6  | 2.6   | 3     |
| WNT5A               | 4     | 2.4  | 2.4   | 1.4  | 2.6   | 3     |
| TCF7                | 2.2   | 1.8  | 2.9   | 2.4  | 2.3   | 3     |

| Up-regulated in 143B |            |            |            |            |      |   |
|----------------------|------------|------------|------------|------------|------|---|
| RAC2                 | 105        | 98         | 59         | 55         | 79.3 | 4 |
| HHIP                 | 19.9       | 34.7       | 31.4       | 57         | 35.8 | 4 |
| WNT7A                | 18.5       | 17.4       | 16.6       | 15.7       | 17.1 | 4 |
| <b>BMP2</b>          | 4.3        | 3.3        | 33         | 26.5       | 16.8 | 4 |
| <b>LEF1</b>          | 2.2        | 2.2        | 16.7       | 17.1       | 9.6  | 4 |
| BMP6                 | 6.8        | 6.2        | 13.1       | 12         | 9.5  | 4 |
| <b>BMP7</b>          | 3.7        | 4.8        | 12.1       | 15         | 8.9  | 4 |
| FZD8                 | 9.8        | 8.5        | 8.5        | 7.3        | 8.5  | 4 |
| <b>WNT7B</b>         | 2.7        | 2.3        | 15.4       | 12.6       | 8.3  | 4 |
| DKK1                 | 8.2        | 8.3        | 5.3        | 5.2        | 6.8  | 4 |
| FOSL1                | 8          | 6.8        | 5.2        | 4.4        | 6.1  | 4 |
| JUN                  | 4.5        | 4.1        | 4.6        | 4.2        | 4.4  | 4 |
| IHH                  | 4.5        | 4.6        | 3.9        | 3.9        | 4.2  | 4 |
| NKD1                 | 2.7        | 3          | 4.2        | 4.8        | 3.7  | 4 |
| TCF7                 | 2.6        | 2.4        | 4.3        | 3.1        | 3.1  | 4 |
| <b>WNT10B</b>        | 2.1        | <b>1.9</b> | 4.2        | 4          | 3.1  | 3 |
| SOX17                | 2.1        | 2.2        | 3          | 3.3        | 2.7  | 4 |
| WNT2B                | 2.9        | 2.4        | 2.9        | 2.4        | 2.7  | 4 |
| PRKACB               | 3.1        | 2.3        | 3          | <b>2</b>   | 2.6  | 3 |
| SFRP1                | 2.6        | <b>1.9</b> | 3.1        | 2.2        | 2.5  | 3 |
| CTNNBIP1             | 2.5        | 3          | <b>1.9</b> | 2.3        | 2.4  | 3 |
| SUFU                 | 2.1        | 2.1        | 2.7        | <b>2.3</b> | 2.3  | 3 |
| DVL1                 | 2.2        | 2.1        | 2.5        | 2.3        | 2.3  | 4 |
| MYC                  | <b>1.9</b> | 2.3        | 2.1        | 2.6        | 2.2  | 3 |

| <b>Up-regulated in LM8</b> |            |            |            |      |      |   |
|----------------------------|------------|------------|------------|------|------|---|
| VANGL1                     | 67.4       | 69.9       | 15.3       | 13.1 | 41.4 | 4 |
| WNT8B                      | 14.1       | 12.1       | 8.1        | 5.9  | 10.1 | 4 |
| <b>NFATC4</b>              | 4.2        | 14.8       | 3.3        | 13.2 | 8.9  | 4 |
| PPP2R5C                    | 14.1       | 6          | 10         | 3.6  | 8.4  | 4 |
| PTCH2                      | 3.5        | 2.2        | 15.3       | 8.3  | 7.3  | 4 |
| IHH                        | <b>4.9</b> | 6.5        | 7.7        | 10   | 7.3  | 3 |
| NKD2                       | 11.9       | 12.2       | <b>2</b>   | 2.2  | 7.1  | 3 |
| WNT1                       | 8.5        | 7.7        | 6.1        | 5.5  | 7.0  | 4 |
| <b>SFRP4</b>               | 5.4        | 2.1        | 14.5       | 5.6  | 6.9  | 4 |
| <b>WNT11</b>               | 4.5        | <b>2</b>   | 11.8       | 4.5  | 5.7  | 3 |
| GLI2                       | 3.8        | 4.3        | 4.4        | 4.8  | 4.3  | 4 |
| APC2                       | 5.4        | 5.7        | <b>1.9</b> | 2.1  | 3.8  | 3 |
| SUFU                       | 2.4        | 2.3        | 4.3        | 4.2  | 3.3  | 4 |
| DVL2                       | 3.4        | <b>2.5</b> | 3.6        | 2.7  | 3.1  | 3 |
| FZD7                       | 3.2        | 2.5        | 3.2        | 2.1  | 2.8  | 4 |
| WNT10B                     | 2.7        | <b>2.2</b> | 2.8        | 2.3  | 2.5  | 3 |
| TCF7                       | 2.4        | 2.6        | <b>2</b>   | 2.1  | 2.3  | 3 |

Figure 3

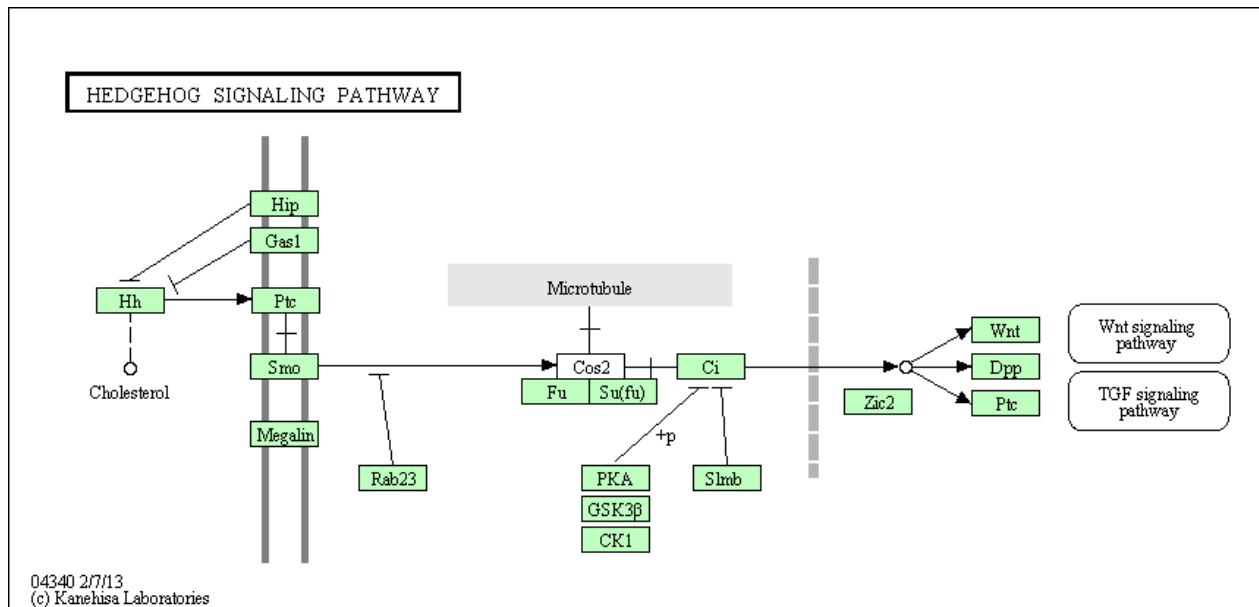

For gene list see: [http://www.genome.jp/dbget-bin/www\\_bget?pathway+hsa04340](http://www.genome.jp/dbget-bin/www_bget?pathway+hsa04340)

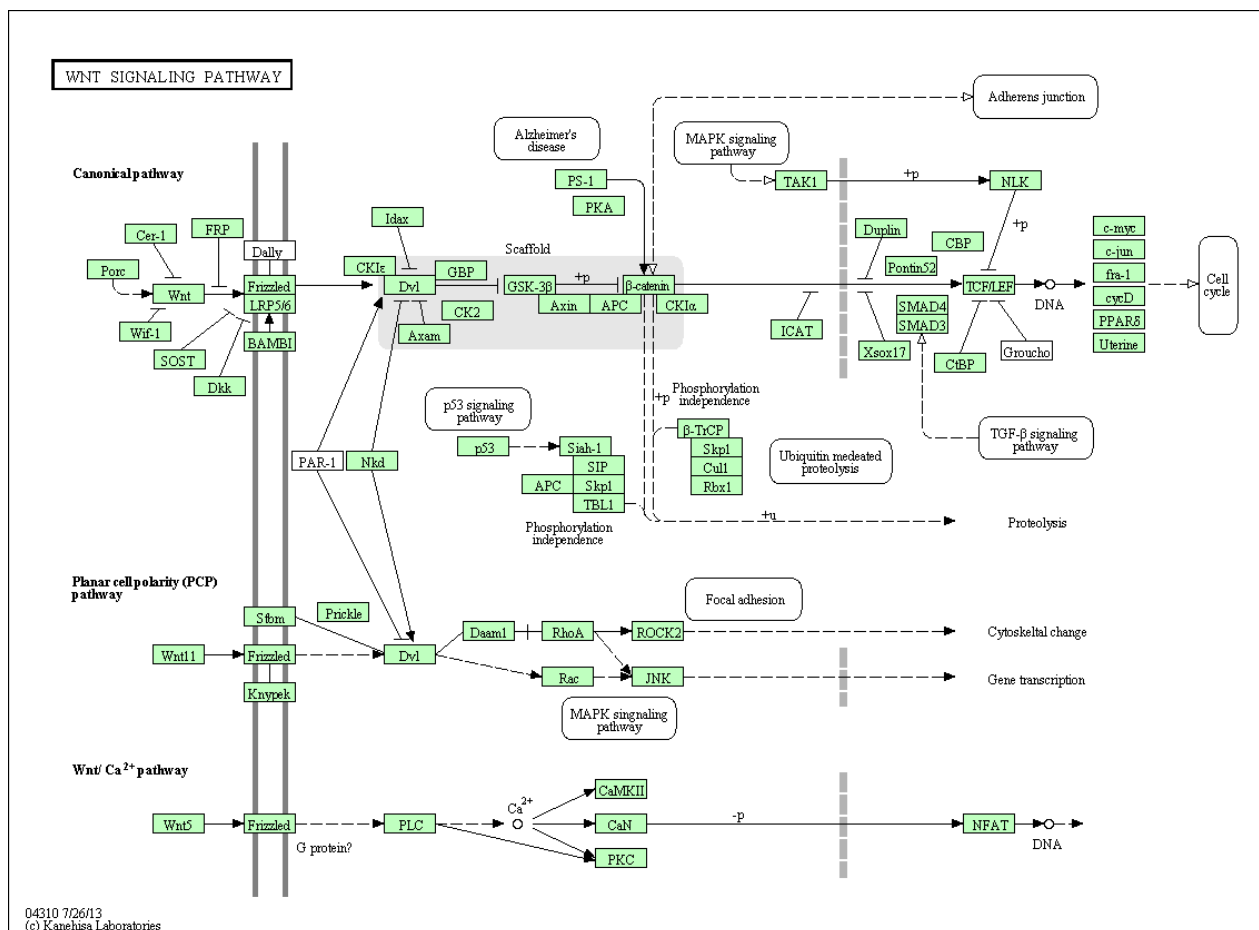

For gene list see: [http://www.genome.jp/dbget-bin/www\\_bget?pathway+hsa04310](http://www.genome.jp/dbget-bin/www_bget?pathway+hsa04310)
